# Supplementary material for: Structurally confined ultrafine NiO nanoparticles on graphene as a highly efficient and durable electrode material for supercapacitors
Source: Royal Society of Chemistry journal article supplement (doi:10.1039/c6ra04880c), 2016-01-01
Supplement: c6ra04880c1.pdf [file c6ra04880c1.pdf]

## Supporting Materials

### Structurally Confined Ultrafine NiO Nanoparticles on Graphene as Highly Efficient and Durable Electrode Material for Supercapacitors

Yi Cheng<sup>a</sup>, Jian Pan<sup>a</sup>, Martin Saunders<sup>b</sup>, Shikui Yao<sup>a</sup>, Pei Kang Shen<sup>c</sup>, Huanting  
Wang<sup>d</sup>, San Ping Jiang<sup>a\*</sup>

<sup>a</sup>Fuels and Energy Technology Institute & Department of Chemical Engineering,  
Curtin University, Perth, WA 6102, Australia

[S.Jiang@curtin.edu.au](mailto:S.Jiang@curtin.edu.au) (SP Jiang)

<sup>b</sup>Centre for Microscopy, Characterisation and Analysis (CMCA), The University of  
Western Australia, Clawley, WA 6009, Australia

<sup>c</sup>Collaborative Innovation Center of Sustainable Energy Materials, Guangxi  
University, Nanning 530004, China

Yi Cheng<sup>a</sup>, Jian Pan<sup>a</sup>, Martin Saunders<sup>b</sup>, Shikui Yao<sup>a</sup>, Pei Kang Shen<sup>c</sup>,  
San Ping Jiang<sup>a\*</sup>

#### Figures.

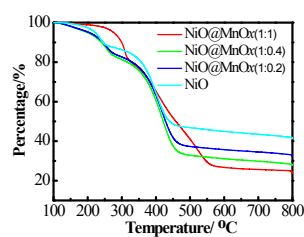

Figure S1. TGA curves of NiO and NiO@MnO<sub>x</sub>

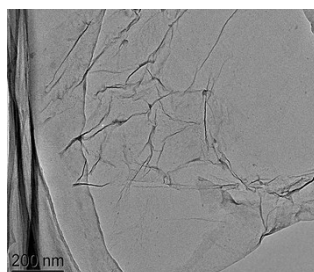

Figure S2. The typical TEM images of as received graphene sheet.

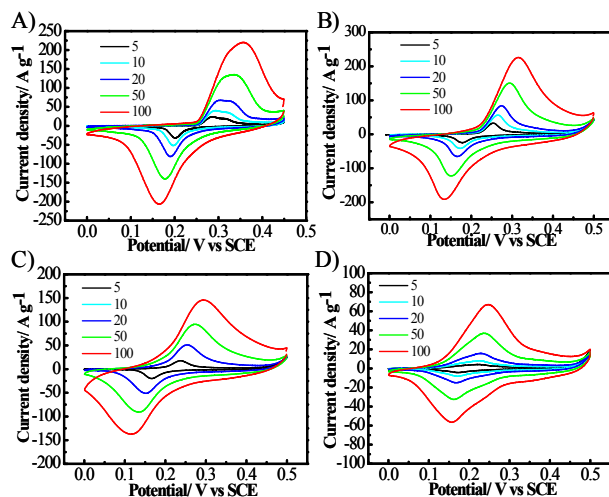

**Figure S3.** CV curves at different scan rate of A) NiO, B) NiO@MnO<sub>x</sub>(1:0.2), C) NiO@MnO<sub>x</sub>(1:0.4), and D) NiO@MnO<sub>x</sub>(1:1).

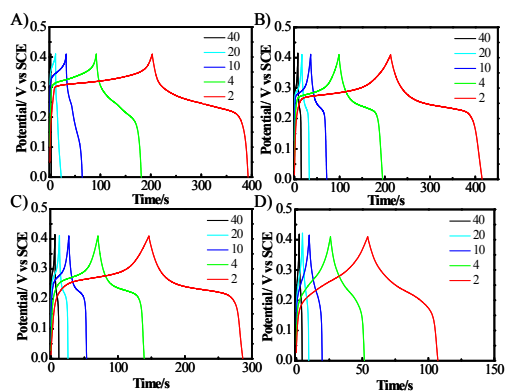

**Figure S4.** Charge and discharge curves at different current densities of A) NiO, B) NiO@MnO<sub>x</sub>(1:0.2), C) NiO@MnO<sub>x</sub>(1:0.4), and D) NiO@MnO<sub>x</sub>(1:1).
